# Supplementary material for: Rubber dam isolation increases the costs and does not impact on composite resin restorations’ survival in primary teeth. 2-year results from a non-inferiority clinical trial
Source: Research Square preprint supplement (doi:10.21203/rs.3.rs-1537801/v1), 2022-05-09
Supplement: Supplementary file 1 [file 7b21bcea3825f9726af23d5b.xlsx]

## Sheet: survival
participant ID	dmft	carieslowhigh	sex	molar	Dente	Superficie	numerosuperf	singlemult	singletwomult	novarest_subst	isola_nisola	Operador	operator	behaviour imp	discomfortimpt	Desconforto	Tempo	OUTCOME	MONTHS	exfoliated	DROPOUT24	itt	FAILURESCORE	MONTHSgrouped	outcomeitt	customaterial_bas	custoprof_bas	custototal_bas	custototalfinal			custobaselinetotal	custofinaltotal
1	6	1	1	1	64	OD	2	1	1	0	0	Haline	0	5	2	2	30	1	13	0	0	1	30	18	1	9.94349	36.735	46.6785	78.3119			20.1984	33.8866
1	6	1	1	1	54	OD	2	1	1	0	1	Rodolfo	1	5	1	1	14	0	12	1	1	0		12	0	4.45038	12.292	16.7424	16.7424			7.24465	7.24465
2	5	1	0	2	65	OM	2	1	1	0	1	Ana Laura	0	5	2	2	16	1	6	0	0	1	30	6	1	4.84538	14.048	18.8934	33.3258			8.17541	14.4205
2	5	1	0	1	84	OD	2	1	1	0	0	Ana Laura	0	2	2	2	44	1	9	0	0	1	21	12	1	10.4975	38.632	49.1295	63.3649			21.259	27.4188
3	4	1	0	2	85	OM	2	1	1	1	1	Rita	1	5	1	1	21	1	6	0	0	1	30	6	1	5.36137	18.438	23.7994	49.0461			10.2983	21.2229
3	4	1	0	1	84	OD	2	1	1	1	1	Haline	0	5	1	1	21	0	24	0	0	0		24	0	5.74439	25.7145	31.4589	31.4589			13.6127	13.6127
4	4	1	0	2	55	MODP	4	1	2	1	0	Tatiane	0	5	1	1	70	0	24	0	0	0		24	0	11.7825	85.715	97.4975	97.4975			42.1885	42.1885
5	15	1	0	1	54	O	1	0	0	0	1	Haline	0	5	2	2	15	0	18	0	1			18	1	4.71537	13.17	17.8854	17.8854			7.73924	7.73924
5	15	1	0	2	65	O	1	0	0	0	0	Karina	1	5	1	1	35	0	18	0	1			18	0	11.4765	42.8575	54.334	54.334			23.511	23.511
6	1	0	1	1	74	OD	2	1	1	0	0	Daibelis	1	5	2	2	10	0	24	0	0	0		24	0	5.06038	8.78	13.8404	13.8404			5.98892	5.98892
7	12	1	0	1	64	OMV	3	1	2	0	1	Haline	0	5	1	1	15	1	13	0	0	1	30	18	1	8.13938	13.17	21.3094	33.8527			9.22085	14.6485
8	11	1	0	2	85	OM	2	1	1	0	0	Mariana	1	5	1	1	52	1	24	0	0	1	40	24	1	10.6925	63.674	74.3665	122.118			32.1794	52.842
9	8	1	0	2	75	O	1	0	0	1	1	Rafael	1	5	1	1	4.58	1	11	0	0	1	20	12	1	5.59437	5.60821	11.2026	58.4292			4.8475	25.2831
9	8	1	0	1	54	OD	2	1	1	0	1	Ana Laura	0	5	1	1	33.27	0	24	0	0	0		24	0	6.61338	29.2111	35.8244	35.8244			15.5017	15.5017
9	8	1	0	1	64	OD	2	1	1	0	0	Rodolfo	1	5	1	1	20.27	0	24	0	0	0		24	0	9.3945	17.7971	27.1916	27.1916			11.7661	11.7661
9	8	1	0	2	65	OM	2	1	1	0	0	Ana Laura	0	5	1	1	25.22	0	24	0	0	0		24	0	12.1965	22.1432	34.3396	34.3396			14.8592	14.8592
9	8	1	0	2	85	V	1	0	0	0	1	Rafael	1	5	1	1	3.15	1	4	0	0	1	13	6	1	4.59304	2.7657	7.35874	17.3072			3.18422	7.48907
9	8	1	0	1	64	OM	2	1	1	0	0	Rodolfo	1	5	1	1	21	1	9	0	0	1	30	12	1	9.3945	18.438	27.8325	48.7078			12.0435	21.0765
10	1	0	1	1	74	O	1	0	0	0	1	Haline	0	5	1	1	16	0	24	0	0	0		24	0	5.11503	19.592	24.707	24.707			10.6911	10.6911
11	11	1	1	1	54	OM	2	1	1	0	0	Haline	0	5	1	1	13	1	7	0	0	1	30	12	1	8.1625	11.414	19.5765	41.0322			8.47101	17.7552
12	13	1	0	1	64	OD	2	1	1	0	1	Ana Laura	0	4	1	1	27	0	24	0	0	0		24	0	4.59937	23.706	28.3054	31.9447			12.2481	13.8229
13	8	1	1	1	84	OD	2	1	1	0	1	Rita	1	5	1	1	13	0	11	1	0	0		12	0	4.54903	11.414	15.963	30.1404			6.90741	13.0421
14	10	1	1	1	54	OVM	3	1	2	0	1	Cintia	1	5	1	1	17	1	6	0	0	1	30	6	1	7.64339	14.926	22.5694	75.9513			9.76607	32.8651
14	10	1	1	1	84	OD	2	1	1	0	1	Cintia	1	5	1	1	12	0	9	0	1			12	0	6.05437	10.536	16.5904	16.5904			7.17887	7.17887
15	14	1	1	2	55	O	1	0	0	1	0	Simone	0	5	1	1	23	1	13	0	0	1	11	18	1	10.6395	28.1635	38.803	48.8944			16.7906	21.1572
15	14	1	1	2	75	OP	2	1	1	1	1	Haline	0	5	1	1	34	1	24	0	0	1	11	24	1	10.3754	29.852	40.2274	40.2274			17.4069	17.4069
15	14	1	1	2	65	O	1	0	0	0	1	Daniele	1	5	1	1	16	0	24	0	0	0		24	0	8.05239	19.592	27.6444	27.6444			11.9621	11.9621
15	14	1	1	1	74	OMOD	4	1	2	0	1	Daniele	1	5	1	1	16	0	24	0	0	0		24	0	8.05239	19.592	27.6444	27.6444			11.9621	11.9621
16	10	1	1	1	64	OD	2	1	1	0	1	Ana Laura	0	5	1	1	25	0	21	0	0	0		24	0	5.90538	30.6125	36.5179	96.145			15.8018	41.6032
16	10	1	1	1	74	OD	2	1	1	0	0	Daibelis	1	5	1	1	11	1	24	0	0	1	30	24	1	6.83338	13.4695	20.3029	20.3029			8.78532	8.78532
16	10	1	1	2	85	OM	2	1	1	0	0	Haline	0	5	1	1	27	0	24	0	0	0		24	0	9.86351	23.706	33.5695	33.5695			14.526	14.526
17	16	1	1	1	74	ODV	3	1	2	1	1	Ana Laura	0	5	5	5	30.1	1	15	0	0	1	21	18	1	7.46038	26.4278	33.8882	33.8882			14.6639	14.6639
17	16	1	1	2	55	OM	2	1	1	1	0	Haline	0	5	6	6	23.1	0	24	0	0	0		24	0	13.3885	20.2818	33.6703	33.6703			14.5696	14.5696
17	16	1	1	1	84	ODP	3	1	2	0	1	Haline	0	5	5	5	24.4	1	13	0	0	1	30	18	1	5.17537	21.4232	26.5986	75.228			11.5096	32.5521
18	8	1	1	2	85	O	1	0	0	0	0	Mariana	1	5	1	1	31	0	24	0	0	0		24	0	8.99918	27.218	36.2172	36.2172			15.6716	15.6716
19	3	0	0	1	74	OD	2	1	1	1	0	Ana Laura	0	5	1	1	50	1	18	0	0	1	21	18	1	8.59651	43.9	52.4965	77.7819			22.7159	33.6572
19	3	0	0	1	84	OD	2	1	1	1	0	Isabel	0	5	1	1	13	1	18	0	0	1	13	18	1	9.57815	15.9185	25.4967	41.0514			11.0327	17.7635
19	3	0	0	2	75	O	1	0	0	0	0	Ana Laura	0	5	1	1	57	0	24	0	0	0		24	0	8.59651	50.046	58.6425	58.6425			25.3754	25.3754
20	5	1	0	1	84	OPD	3	1	2	0	1	Daibelis	1	5	1	1	16	0	24	0	0	0		24	0	5.8824	14.048	19.9304	19.9304			8.62414	8.62414
20	5	1	0	1	74	OPD	3	1	2	0	0	Rafael	1	5	1	1	37	1	11	0	0	1	21	12	1	9.15151	45.3065	54.458	54.458			23.5647	23.5647
21	14	1	1	1	54	OM	2	1	1	0	0	Tatiane	0	5	1	1	44	1	14	0	0	1	30	18	1	11.6045	38.632	50.2365	69.8559			21.738	30.2276
21	14	1	1	1	64	OM	2	1	1	0	0	Rafael	1	5	1	1	25	0	24	0	0	0		24	0	9.30149	30.6125	39.914	49.6344			17.2713	21.4774
21	14	1	1	2	65	O	1	0	0	0	1	Rafael	1	5	1	1	9	0	24	0	0	0		24	0	5.78337	11.0205	16.8039	16.8039			7.27126	7.27126
22	12	1	1	2	85	O	1	0	0	1	1	Rafael	1	5	1	1	8	0	24	0	0	0		24	0	10.9264	7.024	17.9504	17.9504			7.76736	7.76736
22	12	1	1	1	84	OL	2	1	1	0	0	Rafael	1	5	1	1	19	1	18	0	0	1	30	18	1	10.4865	16.682	27.1685	94.7253			11.7562	40.9889
22	12	1	1	1	64	OD	2	1	1	0	0	Haline	0	5	1	1	17	1	14	0	0	1	30	18	1	10.2785	14.926	25.2045	63.8776			10.9063	27.6407
23	3	0	1	2	65	O	1	0	0	0	0	Tatiane	0	5	6	6	25	1	14	0	0	1	21	18	1	8.94952	30.6125	39.562	68.0542			17.119	29.448
24	8	1	1	2	55	OMP	3	1	2	1	1	Mari Pinheiro	1	5	2	2	24.2	0	24	0	0	0		24	0	5.85538	21.2476	27.103	27.103			11.7278	11.7278
24	8	1	1	2	65	OM	2	1	1	1	1	Mari Pinheiro	1	5	1	1	21	1	7	0	0	1	12	12	1	6.37238	25.7145	32.0869	101.887			13.8844	44.0876
25	8	1	1	2	65	OD	2	1	1	0	1	Ana Laura	0	5	1	1	9.46	0	24	0	0	0		24	0	6.25837	8.30588	14.5643	14.5643			6.30214	6.30214
26	10	1	0	1	74	ODVL	4	1	2	1	0	Ana Laura	0	5	1	1	40	0	5	0	1			6	1	13.7515	35.12	48.8715	92.9985			21.1473	40.2417
26	10	1	0	2	75	O	1	0	0	0	0	Ana Laura	0	5	1	1	35	1	5	0	0	1	40	6	1	11.2115	30.73	41.9415	41.9415			18.1486	18.1486
26	10	1	0	2	55	O	1	0	0	0	1	Haline	0	5	1	1	17	0	4	0	1			6	0	4.62538	14.926	19.5514	19.5514			8.46014	8.46014
27	3	0	1	2	65	OM	2	1	1	1	1	Simone	0	5	1	1	6	0	24	0	0	0		24	0	4.74237	5.268	10.0104	24.3728			4.33162	10.5464
28	2	0	1	2	85	OM	2	1	1	0	1	Haline	0	5	3	3	12	0	24	0	0	0		24	0	4.74137	10.536	15.2774	15.2774			6.61072	6.61072
29	3	0	0	2	55	ODP	3	1	2	1	1	Simone	0	5	1	1	5	1	13	0	0	1	21	18	1	5.67136	6.1225	11.7939	48.3251			5.10336	20.9109
30	6	1	1	2	55	OP	2	1	1	1	0	Rafael	1	5	1	1	25.3	0	13	1	0	0		18	0	8.5545	22.2134	30.7679	30.7679			13.3137	13.3137
31	5	1	1	1	84	OD	2	1	1	0	1	Ana Laura	0	5	1	1	18.28	1	5	0	0	1	30	6	1	6.05641	22.3839	28.4403	53.6219			12.3065	23.2029
32	11	1	1	2	55	ODP	3	1	2	1	1	Haline	0	5	1	1	60	0	24	0	0	0		24	0	12.4404	52.68	65.1204	65.1204			28.1785	28.1785
33	1	0	1	2	85	OM	2	1	1	0	0	Raiza	1	5	1	1	18	0	14	0	1			18	0	7.84449	15.804	23.6485	23.6485			10.233	10.233
34	4	1	1	1	54	OD	2	1	1	0	1	Isabela	1	5	1	1	25	0	24	0	0	0		24	0	6.44538	21.95	28.3954	28.3954			12.2871	12.2871
35	12	1	1	1	74	O	1	0	0	0	0	Haline	0	5	1	1	24	0	13	0	1			18	1	8.29351	21.072	29.3655	29.3655			12.7068	12.7068
36	1	0	0	1	64	ODP	3	1	2	1	0	Haline	0	5	4	4	41	0	6	0	1			6	0	11.2135	50.2045	61.418	61.418			26.5764	26.5764
37	8	1	1	2	75	OD	2	1	1	1	1	Mariana	1	4	2	2	26	0	24	0	0	0		24	0	8.55104	31.837	40.388	40.388			17.4764	17.4764
37	8	1	1	2	85	OD	2	1	1	1	1	Mariana	1	4	2	2	16	0	24	0	0	0		24	0	4.59638	19.592	24.1884	33.2397			10.4666	14.3833
37	8	1	1	2	85	OM	2	1	1	0	0	Simone	0	4	3	3	11	0	24	0	0	0		24	0	6.72211	9.658	16.3801	16.3801			7.08789	7.08789
37	8	1	1	2	75	OM	2	1	1	0	1	Mariana	1	5	3	3	11	0	24	0	0	0		24	0	5.55803	13.4695	19.0275	39.3009			8.23346	17.006
37	8	1	1	1	64	OD	2	1	1	0	1	Mariana	1	4	1	1	38	0	24	0	0	0		24	0	13.8045	46.531	60.3355	60.3355			26.108	26.108
37	8	1	1	2	65	O	1	0	0	0	1	Mariana	1	4	1	1	13	0	24	0	0	0		24	0	6.90236	15.9185	22.8209	22.8209			9.87488	9.87488
37	8	1	1	2	55	O	1	0	0	0	1	Mariana	1	5	1	1	12	0	24	0	0	0		24	0	5.95539	14.694	20.6494	20.6494			8.93526	8.93526
38	4	1	1	2	65	M	1	0	0	0	1	Haline	0	5	1	1	11	0	24	0	0	0		24	0	6.20037	13.4695	19.6699	19.6699			8.51141	8.51141
39	11	1	1	2	75	OM	2	1	1	0	1	Dai	1	5	1	1	10	0	24	0	0	0		24	0	6.46739	8.78	15.2474	15.2474			6.59775	6.59775
40	14	1	1	2	75	P	1	0	0	0	1	Karina	1	5	1	1	5	1	6	0	0	1	30	6	1	5.28337	6.1225	11.4059	41.4253			4.93547	17.9253
41	5	1	1	2	55	OVM	3	1	2	1	1	Rafael	1	5	2	2	10	0	5	1	0	0		6	0	7.17337	12.245	19.4184	19.4184			8.40259	8.40259
41	5	1	1	2	65	ODP	3	1	2	1	0	Ana Laura	0	5	3	3	40	0	24	0	0	0		24	0	9.6195	35.12	44.7395	44.7395			19.3594	19.3594
42	7	1	1	2	65	P	1	0	0	0	0	Mari Pinheiro	1	5	1	1	27.21	0	24	0	0	0		24	0	9.64617	33.3186	42.9648	42.9648			18.5914	18.5914
42	7	1	1	1	74	D	1	0	0	0	0	Dai	1	5	1	1	22.26	0	24	0	0	0		24	0	10.9945	27.2574	38.2519	38.2519			16.5521	16.5521
43	5	1	1	1	84	OD	2	1	1	1	0	Ana Laura	0	2	1	1	36	1	18	0	0	1	30	18	1	13.2062	44.082	57.2882	350.776			24.7893	151.785
43	5	1	1	2	85	OM	2	1	1	1	0	Ana Laura	0	2	1	1	36	1	14	0	0	1	21	18	1	13.2062	44.082	57.2882	66.9275			24.7893	28.9604
44	6	1	0	2	75	O	1	0	0	1	1	Simone	0	5	1	1	8	1	8	0	0	1	30	12	1	6.88337	9.796	16.6794	39.4948			7.21738	17.0899
44	6	1	0	1	74	OD	2	1	1	0	0	Simone	0	5	6	6	7	1	8	0	0	1	12	12	1	10.1815	8.5715	18.753	46.1334			8.11467	19.9625
44	6	1	0	2	65	OD	2	1	1	0	1	Ana Laura	0	5	1	1	12.4	0	24	0	0	0		24	0	7.52905	10.8872	18.4162	18.4162			7.96895	7.96895
44	6	1	0	1	54	OD	2	1	1	0	0	Rafael	1	4	6	6	31.3	0	24	0	0	0		24	0	7.76051	27.4814	35.2419	35.2419			15.2496	15.2496
44	6	1	0	2	85	OM	2	1	1	0	1	Rafael	1	5	2	2	12.1	0	24	0	0	0		24	0	3.94738	10.6238	14.5712	14.5712			6.30514	6.30514
45	12	1	0	2	75	VLMOD	5	1	2	1	0	Haline	0	4	3	3	34.31	1	15	0	0	1	21	18	1	13.2662	30.1242	43.3904	96.3461			18.7756	41.6902
45	12	1	0	1	54	ODM	3	1	2	0	1	Haline	0	5	3	3	20.2	1	15	0	0	1	21	18	1	6.10738	17.7356	23.843	38.6922			10.3172	16.7426
45	12	1	0	1	84	OD	2	1	1	0	0	Haline	0	2	3	3	29.24	0	24	0	0	0		24	0	11.3435	35.8044	47.1479	74.1307			20.4015	32.0773
46	4	1	1	2	55	OM	2	1	1	1	0	Haline	0	5	1	1	32.5	0	24	0	0	0		24	0	11.7625	28.535	40.2975	40.2975			17.4373	17.4373
47	10	1	1	1	84	OMDVL	5	1	2	1	1	Rafael	1	5	5	5	12.4	1	6	0	0	1	21	6	1	9.67638	15.1838	24.8602	40.497			10.7573	17.5236
47	10	1	1	1	74	OV	2	1	1	1	0	Rafael	1	5	3	3	19.28	1	6	0	0	1	21	6	1	8.88951	23.6084	32.4979	41.0432			14.0623	17.7599
47	10	1	1	2	55	OVDP	4	1	2	0	0	Rafael	1	5	3	3	21.4	0	24	0	0	0		24	0	7.77251	18.7892	26.5617	26.5617			11.4936	11.4936
48	2	0	1	2	75	V	1	0	0	0	0	Cintia	1	5	2	2	30	0	10	0	1			12	0	9.3065	36.735	46.0415	46.0415			19.9228	19.9228
49	7	1	1	1	54	VPMDO	5	1	2	1	1	Tati	0	5	1	1	57	0	24	0	0	0		24	0	9.16903	50.046	59.215	68.7416			25.6231	29.7454
50	2	0	1	2	65	MODPV	5	1	2	1	1	Haline	0	5	1	1	21	0	9	0	1			12	0	12.5664	25.7145	38.2809	38.2809			16.5646	16.5646
50	2	0	1	1	64	MODPV	5	1	2	1	1	Haline	0	5	1	1	19	0	9	0	1			12	0	10.9554	23.2655	34.2209	34.2209			14.8078	14.8078
51	9	1	0	2	55	O	1	0	0	1	1	Tati	0	4	1	1	8.1	1	18	0	0	1	21	18	1	4.56139	7.1118	11.6732	11.6732			5.05114	5.05114
51	9	1	0	1	54	ODV	3	1	2	0	0	Haline	0	5	2	2	26.3	0	6	1	0	0		6	0	9.6625	23.0914	32.7539	32.7539			14.173	14.173
52	12	1	0	1	54	OMD	3	1	2	1	1	Haline	0	4	2	2	19.4	0	8	1	0	0		12	0	7.35638	17.0332	24.3896	24.3896			10.5537	10.5537
52	12	1	0	1	64	VOP	3	1	2	1	1	Mari Pinheiro	1	5	1	1	28.47	0	8	1	0	0		12	0	6.86239	34.8615	41.7239	41.7239			18.0545	18.0545
53	10	1	1	1	74	ODL	3	1	2	0	1	Rafael	1	5	1	1	7	1	13	0	0	1	30	18	1	4.86037	6.146	11.0064	29.3447			4.7626	12.6979
53	10	1	1	2	75	M	1	0	0	0	1	Rafael	1	5	1	1	8	0	24	0	0	0		24	0	4.86037	7.024	11.8844	27.7631			5.14252	12.0134
54	1	0	0	2	55	OM	2	1	1	0	0	Renata	0	5	1	1	29	0	5	0	1			6	0	9.3095	25.462	34.7715	34.7715			15.0461	15.0461
55	9	1	0	2	75	O	1	0	0	0	0	Rafael	1	5	2	2	25	1	16	0	0	1	30	18	1	8.4255	21.95	30.3755	53.8839			13.1439	23.3162
56	4	1	1	1	54	OD	2	1	1	0	1	Haline	0	5	1	1	20	0	24	0	0	0		24	0	8.73639	24.49	33.2264	33.2264			14.3775	14.3775
56	4	1	1	1	64	ODVL	4	1	2	0	0	Ana Laura	0	5	1	1	60	0	24	0	0	0		24	0	10.9415	73.47	84.4115	84.4115			36.526	36.526
57	11	1	1	1	54	OD	2	1	1	0	1	Bruna	0	1	1	1	22	1	5	0	0	1	30	6	1	5.5494	26.939	32.4884	128.097			14.0582	55.4293
57	11	1	1	1	74	OD	2	1	1	0	1	Rodolfo	1	1	6	6	24	1	9	0	0	1	21	12	1	5.98938	29.388	35.3774	40.6157			15.3083	17.575
57	11	1	1	2	55	OM	2	1	1	0	0	Haline	0	1	1	1	25	1	18	0	0	1	30	18	1	9.41351	21.95	31.3635	57.4209			13.5714	24.8468
57	11	1	1	2	85	OM	2	1	1	0	1	Haline	0	1	6	6	26	0	24	0	0	0		24	0	9.53039	31.837	41.3674	41.3674			17.9002	17.9002
58	7	1	1	1	84	OD	2	1	1	1	1	Haline	0	5	2	2	21	0	24	0	0	0		24	0	6.37438	18.438	24.8124	24.8124			10.7366	10.7366
58	7	1	1	1	74	OD	2	1	1	0	0	Isabel	0	5	2	2	11	0	24	0	0	0		24	0	7.8835	9.658	17.5415	45.3444			7.59044	19.6211
58	7	1	1	2	65	OD	2	1	1	0	1	Renata	0	5	1	1	15	0	24	0	0	0		24	0	3.94938	13.17	17.1194	17.1194			7.40778	7.40778
59	4	1	1	2	75	OL	2	1	1	1	0	Cintia	1	5	2	2	31	1	9	0	0	1	30	12	1	9.36152	37.9595	47.321	91.5147			20.4764	39.5996
59	4	1	1	1	84	OD	2	1	1	0	0	Mari Pinheiro	1	5	1	1	49.2	0	24	0	0	0		24	0	10.1322	60.2454	70.3776	88.016			30.4533	38.0857
59	4	1	1	1	64	O	1	0	0	0	0	Renata	0	5	1	1	25.4	0	24	0	0	0		24	0	9.00617	31.1023	40.1085	48.6858			17.3555	21.067
60	5	1	0	2	55	MVO	3	1	2	0	1	Ana Laura	0	5	1	1	39	1	17	0	0	1	30	18	1	8.94939	34.242	43.1914	64.5581			18.6895	27.9352
61	6	1	0	2	55	OM	2	1	1	0	1	Ana Laura	0	4	1	1	17	1	17	0	0	1	21	18	1	5.88239	14.926	20.8084	20.8084			9.00406	9.00406
61	6	1	0	2	75	OM	2	1	1	0	0	Ana Laura	0	4	1	1	41	0	24	0	0	0		24	0	11.5525	35.998	47.5505	47.5505			20.5757	20.5757
61	6	1	0	1	74	OVM	3	1	2	0	1	Mariana	1	5	1	1	21	0	24	0	0	0		24	0	5.35638	18.438	23.7944	23.7944			10.2961	10.2961
62	8	1	1	2	65	O	1	0	0	0	0	Haline	0	5	2	2	18	0	24	0	0	0		24	0	10.5085	15.804	26.3125	26.3125			11.3858	11.3858
63	6	1	1	1	84	OD	2	1	1	1	1	Dai	1	5	1	1	29.4	1	19	0	0	1	30	24	1	6.40037	36.0003	42.4007	146.986			18.3473	63.6026
63	6	1	1	2	85	P	1	0	0	0	0	Dai	1	4	1	1	34.4	0	24	0	0	0		24	0	8.36249	42.1228	50.4853	50.4853			21.8456	21.8456
63	6	1	1	1	74	OVP	3	1	2	0	0	Karina	1	2	1	1	46	0	24	0	0	0		24	0	9.10652	40.388	49.4945	79.9888			21.4169	34.6122
63	6	1	1	1	64	O	1	0	0	0	0	Isabel	0	5	1	1	12	0	24	0	0	0		24	0	8.3635	10.536	18.8995	18.8995			8.17806	8.17806
63	6	1	1	1	54	OVMD	4	1	2	0	1	Isabel	0	5	1	1	10	1	24	0	0	1	30	24	1	6.14338	8.78	14.9234	45.7611			6.45754	19.8014
64	8	1	0	2	75	O	1	0	0	1	0	Dai	1	2	2	2	35	1	19	0	0	1	30	24	1	13.2125	42.8575	56.07	69.9834			24.2622	30.2827
65	12	1	0	1	54	OM	2	1	1	1	1	Ana Laura	0	5	2	2	14	1	17	0	0	1	30	18	1	6.18637	12.292	18.4784	18.4784			7.99583	7.99583
65	12	1	0	2	55	O	1	0	0	0	1	Ana Laura	0	5	1	1	28	1	17	0	0	1	30	18	1	6.98539	34.286	41.2714	41.2714			17.8587	17.8587
66	9	1	0	1	74	ODLV	4	1	2	1	1	Rafael	1	5	2	2	12.58	1	15	0	0	1	50	18	1	5.03336	11.0452	16.0786	51.8395			6.95742	22.4316
66	9	1	0	1	64	OD	2	1	1	0	1	Karina	1	5	1	1	18.18	1	7	0	0	1	30	12	1	7.53837	22.2614	29.7998	71.5344			12.8948	30.9539
67	8	1	0	1	54	ODMP	4	1	2	1	1	Ana Laura	0	5	1	1	25.5	1	6	0	0	1	21	6	1	6.20337	22.389	28.5924	50.7178			12.3723	21.9462
68	6	1	0	1	54	OD	2	1	1	1	1	Ana Laura	0	5	1	1	23	1	8	0	0	1	11	12	1	6.17038	20.194	26.3644	26.3644			11.4082	11.4082
69	4	1	1	1	84	OD	2	1	1	1	0	Haline	0	5	3	3	40	0	24	0	0	0		24	0	10.4185	35.12	45.5385	45.5385			19.7051	19.7051
70	6	1	1	1	54	OD	2	1	1	1	0	Leandro	1	5	1	1	25	0	19	0	0	0		24	0	10.3045	21.95	32.2545	32.2545			13.957	13.957
70	6	1	1	2	65	OM	2	1	1	1	0	Ana Laura	0	5	1	1	48.35	0	18	1	0	0		18	0	10.3205	42.4513	52.7718	52.7718			22.8351	22.8351
70	6	1	1	1	84	OD	2	1	1	0	0	Rafael	1	5	1	1	24.06	0	18	1	0	0		18	0	11.0975	29.4615	40.559	75.7648			17.5504	32.7844
71	5	1	1	1	54	DP	2	1	1	0	1	Rafael	1	5	1	1	6.2	0	6	0	1			6	0	1.06333	5.4436	6.50693	8.47429			2.81564	3.66694
71	5	1	1	1	64	ODP	3	1	2	0	0	Haline	0	5	2	2	24	0	6	0	1			6	0	7.69439	21.072	28.7664	8.47429			12.4476	3.66694
72	1	0	0	1	64	OD	2	1	1	0	1	Haline	0	5	1	1	15	0	24	0	0	0		24	0	5.95837	13.17	19.1284	19.1284			8.2771	8.2771
73	8	1	1	1	74	ODL	3	1	2	1	0	Simone	0	5	1	1	15	0	24	0	0	0		24	0	9.51151	13.17	22.6815	22.6815			9.81458	9.81458
73	8	1	1	1	84	ODL	3	1	2	1	1	Simone	0	5	1	1	7	0	24	0	0	0		24	0	4.73739	6.146	10.8834	10.8834			4.70938	4.70938
74	10	1	1	2	55	OP	2	1	1	1	1	dai	1	5	1	1	15	0	24	0	0	0		24	0	6.78938	18.3675	25.1569	25.1569			10.8857	10.8857
74	10	1	1	2	75	O	1	0	0	0	1	Karina	1	2	1	1	14.55	1	12	0	0	1	30	12	1	6.98737	12.7749	19.7623	35.72			8.55139	15.4565
75	1	0	1	1	74	OD	2	1	1	0	0	Haline	0	5	3	3	39.24	0	6	0	1			6	0	11.7615	34.4527	46.2142	46.2142			19.9975	19.9975
76	4	1	0	2	85	V	1	0	0	1	0	Dai	1	5	3	3	28	0	24	0	0	0		24	0	10.3475	34.286	44.6335	44.6335			19.3135	19.3135
76	4	1	0	2	75	V	1	0	0	0	0	Haline	0	5	2	2	21.3	0	24	0	0	0		24	0	8.0505	18.7014	26.7519	26.7519			11.5759	11.5759
77	4	1	0	1	74	OM	2	1	1	0	1	Mari Pinheiro	1	5	1	1	12.45	0	24	0	0	0		24	0	5.91438	15.245	21.1594	21.1594			9.15595	9.15595
78	4	1	1	2	85	O	1	0	0	1	0	Ana Laura	0	5	1	1	34.1	0	8	1	0	0		12	0	7.83651	29.9398	37.7763	37.7763			16.3463	16.3463
79	9	1	1	1	64	MDPO	4	1	2	1	0	Mariana	1	5	1	1	40	0	24	0	0	0		24	0	9.21151	35.12	44.3315	44.3315			19.1828	19.1828
79	9	1	1	2	65	MDVPO	5	1	2	1	0	Mariana	1	5	1	1	40	1	13	0	0	1	12	18	1	9.21151	35.12	44.3315	73.7269			19.1828	31.9026
79	9	1	1	1	54	MODPV	5	1	2	0	1	Karina	1	5	1	1	16	1	4	0	0	1	30	6	1	7.31537	14.048	21.3634	45.7331			9.24421	19.7893
79	9	1	1	2	55	MODPV	5	1	2	0	0	Karina	1	5	1	1	25	0	24	0	0	0		24	0	12.1465	21.95	34.0965	40.7559			14.754	17.6356
79	7	1	1	2	85	OM	2	1	1	0	0	Rita	1	5	1	1	19	1	18	0	0	1	30	18	1	10.7375	23.2655	34.003	34.003			14.7135	14.7135
80	12	1	1	2	85	VLOD	4	1	2	1	1	Mariana	1	5	1	1	15	0	14	1	0	0		18	0	5.11236	13.17	18.2824	18.2824			7.91102	7.91102
81	5	1	1	1	84	O	1	0	0	0	1	Bruna	0	5	1	1	8	0	24	0	0	0		24	0	5.34338	9.796	15.1394	15.1394			6.55101	6.55101
82	7	1	0	2	75	ODLV	4	1	2	1	0	Haline	0	5	1	1	38	0	24	0	0	0		24	0	12.7415	33.364	46.1055	77.3978			19.9505	33.4911
82	7	1	0	2	85	O	1	0	0	1	0	Rafael	1	5	1	1	29	1	14	0	0	1	21	18	1	8.2575	25.462	33.7195	83.2614			14.5909	36.0283
83	11	1	0	1	54	OD	2	1	1	0	0	Ana Laura	0	5	6	6	18	0	24	0	0	0		24	0	10.6915	15.804	26.4955	26.4955			11.465	11.465
83	11	1	0	2	55	O	1	0	0	0	0	Ana Laura	0	5	6	6	18	0	24	0	0	0		24	0	10.6915	15.804	26.4955	26.4955			11.465	11.465
83	11	1	0	2	65	OM	2	1	1	0	1	Mariana	1	5	1	1	17	0	24	0	0	0		24	0	5.21237	14.926	20.1384	20.1384			8.71414	8.71414
84	2	0	0	1	84	V	1	0	0	1	0	Haline	0	5	3	3	30	0	24	0	0	0		24	0	8.15551	26.34	34.4955	34.4955			14.9267	14.9267
85	5	1	0	1	84	O	1	0	0	1	1	Cintia	1	5	1	1	8	1	13	0	0	1	30	18	1	5.50737	9.796	15.3034	44.6501			6.62197	19.3207
86	9	1	1	1	54	O	1	0	0	0	0	Tati	0	1	1	1	30	0	24	0	0	0		24	0	13.2835	36.735	50.0185	50.0185			21.6437	21.6437
86	9	1	1	2	65	OP	2	1	1	0	0	Haline	0	5	1	1	19	0	24	0	0	0		24	0	12.1525	23.2655	35.418	35.418			15.3258	15.3258
87	4	1	0	1	84	OD	2	1	1	0	0	Ana Laura	0	5	5	5	48.1	0	24	0	0	0		24	0	10.3355	58.8984	69.234	69.234			29.9584	29.9584
88	3	0	0	1	64	OD	2	1	1	0	0	Rafael	1	5	1	1	23.39	1	14	0	0	1	30	18	1	8.2845	20.5364	28.8209	254.121			12.4712	109.961
89	8	1	0	1	64	OD	2	1	1	0	0	Rodolfo	1	4	3	3	34.2	0	24	0	0	0		24	0	8.14251	30.0276	38.1701	38.1701			16.5167	16.5167
89	8	1	0	2	65	OM	2	1	1	0	1	Haline	0	5	3	3	32.1	1	24	0	0	1	30	24	1	11.1364	39.3064	50.4428	54.49			21.8273	23.5785
90	3	0	1	1	54	OD	2	1	1	0	1	Tati	0	5	5	5	29	1	13	0	0	1	30	18	1	8.38038	35.5105	43.8909	77.2324			18.9922	33.4195
90	3	0	1	2	85	O	1	0	0	0	1	Tati	0	5	1	1	11	0	13	0	1			18	0	5.02237	9.658	14.6804	14.6804			6.35239	6.35239
91	3	0	1	1	54	OV	2	1	1	1	0	Mariana	1	5	1	1	40	0	24	0	0	0		24	0	9.18553	48.98	58.1655	58.1655			25.169	25.169
91	3	0	1	1	64	OMDVP	5	1	2	1	0	Ana Laura	0	5	1	1	43	1	18	0	0	1	20	18	1	10.5865	52.6535	63.24	86.2414			27.3648	37.3178
92	3	0	0	1	64	O	1	0	0	1	1	Mari	1	5	2	2	12.5	1	8	0	0	1	12	12	1	5.65737	15.3062	20.9636	51.0478			9.07123	22.0891
93	6	1	1	1	54	OD	2	1	1	1	0	Isabela	1	5	1	1	57	1	11	0	0	1	21	12	1	11.5255	50.046	61.5715	61.5715			26.6428	26.6428

## Sheet: Sheet5
13
12
6
9
18
18
24
13
24
24
24
24
4
9
24
7
24
11
6
9
24
24
21
24
24
13
24
24
24
11
14
24
24
18
14
14
24
5
4
24
5
14
24
13
24
24
24
24
24
24
24
6
24
24
8
24
24
24
15
24
24
10
6
13
24
5
16
24
24
5
9
18
24
24
24
24
24
17
17
24
24
24
24
24
24
24
17
7
18
6
6
24
12
6
24
24
4
24
18
24
24
24
24
24
24
24
14
24
24
13
13

## Sheet: Sheet1
					Profissional	Material
				RBI	0.755683	0.244317
				CRI	0.737033	0.262967
					Profissional	Material	Total
				RBI	13.3362	4.31169	17.6479
				CRI	7.93163	2.82994	10.7616

## Sheet: Sheet3
	1	2	3	4	5	6
RBI	55	12	11	1	1	6
CRI	66	12	4	0	4	2
		Definitely negative	Negative	Positive	Definitely Positive
	RBI	2	6	6	72
	CRI	3	1	8	76

## Sheet: Sheet2
_1_itt	_2_itt	_3_itt	_4_itt	_5_itt	_6_itt	_7_itt	_8_itt	_9_itt	_10_itt	_11_itt	_12_itt	_13_itt	ittimputado
1	1	1	1	1	1	1	1	1	1	1	1	1	1
0	0	0	0	0	0	0	0	0	0	0	0	0	0
1	1	1	1	1	1	1	1	1	1	1	1	1	1
1	1	1	1	1	1	1	1	1	1	1	1	1	1
1	1	1	1	1	1	1	1	1	1	1	1	1	1
0	0	0	0	0	0	0	0	0	0	0	0	0	0
0	0	0	0	0	0	0	0	0	0	0	0	0	0
0	1	1	1	1	1	0	1	0	1	1	0	0	1
1	1	1	1	1	1	1	1	1	1	0	1	0	1
0	0	0	0	0	0	0	0	0	0	0	0	0	0
1	1	1	1	1	1	1	1	1	1	1	1	1	1
1	1	1	1	1	1	1	1	1	1	1	1	1	1
1	1	1	1	1	1	1	1	1	1	1	1	1	1
0	0	0	0	0	0	0	0	0	0	0	0	0	0
0	0	0	0	0	0	0	0	0	0	0	0	0	0
0	0	0	0	0	0	0	0	0	0	0	0	0	0
1	1	1	1	1	1	1	1	1	1	1	1	1	1
1	1	1	1	1	1	1	1	1	1	1	1	1	1
0	0	0	0	0	0	0	0	0	0	0	0	0	0
1	1	1	1	1	1	1	1	1	1	1	1	1	1
0	0	0	0	0	0	0	0	0	0	0	0	0	0
0	0	0	0	0	0	0	0	0	0	0	0	0	0
1	1	1	1	1	1	1	1	1	1	1	1	1	1
1	1	1	0	1	1	1	0	1	1	1	0	1	1
1	1	1	1	1	1	1	1	1	1	1	1	1	1
1	1	1	1	1	1	1	1	1	1	1	1	1	1
0	0	0	0	0	0	0	0	0	0	0	0	0	0
0	0	0	0	0	0	0	0	0	0	0	0	0	0
0	0	0	0	0	0	0	0	0	0	0	0	0	0
1	1	1	1	1	1	1	1	1	1	1	1	1	1
0	0	0	0	0	0	0	0	0	0	0	0	0	0
1	1	1	1	1	1	1	1	1	1	1	1	1	1
0	0	0	0	0	0	0	0	0	0	0	0	0	0
1	1	1	1	1	1	1	1	1	1	1	1	1	1
0	0	0	0	0	0	0	0	0	0	0	0	0	0
1	1	1	1	1	1	1	1	1	1	1	1	1	1
1	1	1	1	1	1	1	1	1	1	1	1	1	1
0	0	0	0	0	0	0	0	0	0	0	0	0	0
0	0	0	0	0	0	0	0	0	0	0	0	0	0
1	1	1	1	1	1	1	1	1	1	1	1	1	1
1	1	1	1	1	1	1	1	1	1	1	1	1	1
0	0	0	0	0	0	0	0	0	0	0	0	0	0
0	0	0	0	0	0	0	0	0	0	0	0	0	0
0	0	0	0	0	0	0	0	0	0	0	0	0	0
1	1	1	1	1	1	1	1	1	1	1	1	1	1
1	1	1	1	1	1	1	1	1	1	1	1	1	1
1	1	1	1	1	1	1	1	1	1	1	1	1	1
0	0	0	0	0	0	0	0	0	0	0	0	0	0
1	1	1	1	1	1	1	1	1	1	1	1	1	1
0	0	0	0	0	0	0	0	0	0	0	0	0	0
1	1	1	1	1	1	1	1	1	1	1	1	1	1
1	1	1	1	1	1	1	1	1	1	1	1	1	1
1	1	1	1	1	1	1	1	1	1	1	1	1	1
0	0	0	0	0	0	0	0	0	0	0	0	0	0
0	0	0	0	0	0	0	0	0	0	0	0	0	0
1	1	1	1	1	1	1	1	1	1	1	1	1	1
0	0	0	0	0	0	0	0	0	0	0	0	0	0
1	1	1	1	1	1	1	1	1	1	1	1	1	1
0	0	0	0	0	0	0	0	0	0	0	0	0	0
1	0	0	0	1	1	1	1	1	1	0	0	1	1
0	0	0	0	0	0	0	0	0	0	0	0	0	0
1	1	1	1	1	1	0	1	0	1	1	1	0	1
1	1	0	1	1	1	1	1	1	1	1	1	1	1
0	0	0	0	0	0	0	0	0	0	0	0	0	0
0	0	0	0	0	0	0	0	0	0	0	0	0	0
0	0	0	0	0	0	0	0	0	0	0	0	0	0
0	0	0	0	0	0	0	0	0	0	0	0	0	0
0	0	0	0	0	0	0	0	0	0	0	0	0	0
0	0	0	0	0	0	0	0	0	0	0	0	0	0
0	0	0	0	0	0	0	0	0	0	0	0	0	0
0	0	0	0	0	0	0	0	0	0	0	0	0	0
0	0	0	0	0	0	0	0	0	0	0	0	0	0
1	1	1	1	1	1	1	1	1	1	1	1	1	1
0	0	0	0	0	0	0	0	0	0	0	0	0	0
0	0	0	0	0	0	0	0	0	0	0	0	0	0
0	0	0	0	0	0	0	0	0	0	0	0	0	0
0	0	0	0	0	0	0	0	0	0	0	0	0	0
1	1	1	1	1	1	1	1	1	1	1	1	1	1
1	1	1	1	1	1	1	1	1	1	1	1	1	1
1	1	1	1	1	1	1	1	1	1	1	1	1	1
1	1	1	1	1	1	1	1	1	1	1	1	1	1
0	0	0	0	0	0	0	0	0	0	0	0	0	0
0	0	0	0	0	0	0	0	0	0	0	0	0	0
0	0	0	0	0	0	0	0	0	0	0	0	0	0
1	1	1	1	1	1	1	1	1	1	1	1	1	1
1	1	1	1	1	1	1	1	1	1	1	1	1	1
0	0	0	0	0	0	0	0	0	0	0	0	0	0
0	0	0	0	0	0	0	0	0	0	0	0	0	0
1	1	1	1	1	1	1	1	1	1	1	1	1	1
1	1	1	1	1	1	1	1	1	1	1	1	1	1
0	0	0	0	0	0	0	0	0	0	0	0	0	0
1	1	0	0	1	1	1	1	1	1	0	1	0	1
0	0	0	0	0	0	0	0	0	0	0	0	0	0
1	0	0	1	0	1	1	1	1	0	1	0	1	1
0	0	0	0	1	1	1	1	1	1	1	1	1	1
1	1	1	1	1	1	1	1	1	1	1	1	1	1
0	0	0	0	0	0	0	0	0	0	0	0	0	0
0	0	0	0	0	0	0	0	0	0	0	0	0	0
0	0	0	0	0	0	0	0	0	0	0	0	0	0
1	1	1	1	1	1	1	1	1	1	1	1	1	1
0	0	0	0	0	0	0	0	0	0	0	0	0	0
1	1	1	1	1	1	1	1	1	1	1	1	1	1
1	1	1	1	1	1	1	1	1	1	1	1	1	1
0	0	0	0	0	0	0	0	0	0	0	0	0	0
0	0	0	0	0	0	0	0	0	0	0	0	0	0
1	1	1	1	1	1	1	1	1	1	1	1	1	1
1	1	1	1	1	1	1	1	1	1	1	1	1	1
1	1	1	1	1	1	1	1	1	1	1	1	1	1
0	0	0	0	0	0	0	0	0	0	0	0	0	0
0	0	0	0	0	0	0	0	0	0	0	0	0	0
0	0	0	0	0	0	0	0	0	0	0	0	0	0
0	0	0	0	0	0	0	0	0	0	0	0	0	0
1	1	1	1	1	1	1	1	1	1	1	1	1	1
0	0	0	0	0	0	0	0	0	0	0	0	0	0
0	0	0	0	0	0	0	0	0	0	0	0	0	0
1	1	1	1	1	1	1	1	1	1	1	1	1	1
1	1	1	1	1	1	1	1	1	1	1	1	1	1
0	0	0	0	0	0	0	0	0	0	0	0	0	0
0	0	0	0	0	0	0	0	0	0	0	0	0	0
0	0	0	0	0	0	0	0	0	0	0	0	0	0
1	1	1	1	1	1	1	1	1	1	1	1	1	1
0	0	0	0	0	0	0	0	0	0	0	0	0	0
0	0	0	0	0	0	0	0	0	0	0	0	0	0
0	0	0	0	0	0	0	0	0	0	0	0	0	0
1	1	1	1	1	1	1	1	1	1	1	1	1	1
1	1	1	1	1	1	1	1	1	1	1	1	1	1
1	1	1	1	1	1	1	1	1	1	1	1	1	1
1	1	1	1	1	1	1	1	1	1	1	1	1	1
1	1	1	1	1	1	1	1	1	1	1	1	1	1
1	1	1	1	1	1	1	1	1	1	1	1	1	1
1	1	1	1	1	1	1	1	1	1	1	1	1	1
1	1	1	1	1	1	1	1	1	1	1	1	1	1
0	0	0	0	0	0	0	0	0	0	0	0	0	0
0	0	0	0	0	0	0	0	0	0	0	0	0	0
0	0	0	0	0	0	0	0	0	0	0	0	0	0
0	0	0	0	0	0	0	0	0	0	0	0	0	0
1	1	0	0	1	1	0	0	1	1	1	1	1	1
1	1	1	1	1	1	1	1	1	1	1	1	1	1
0	0	0	0	0	0	0	0	0	0	0	0	0	0
0	0	0	0	0	0	0	0	0	0	0	0	0	0
0	0	0	0	0	0	0	0	0	0	0	0	0	0
0	0	0	0	0	0	0	0	0	0	0	0	0	0
1	1	1	1	1	1	1	1	1	1	1	1	1	1
1	1	1	1	1	1	1	1	1	1	1	1	1	1
0	0	0	0	0	0	0	0	0	0	0	0	0	0
0	0	0	0	0	0	0	0	0	0	0	0	0	0
0	0	0	0	0	0	0	0	0	0	0	0	0	0
0	0	0	0	0	0	0	0	0	0	0	0	0	0
0	0	0	0	0	0	0	0	0	0	0	0	0	0
1	1	1	1	1	1	1	1	1	1	1	1	1	1
1	1	1	1	1	1	1	1	1	1	1	1	1	1
0	0	0	0	0	0	0	0	0	0	0	0	0	0
1	1	1	1	1	1	1	1	1	1	1	1	1	1
0	0	0	0	0	0	0	0	0	0	0	0	0	0
0	0	0	0	0	0	0	0	0	0	0	0	0	0
0	0	0	0	0	0	0	0	0	0	0	0	0	0
1	1	1	1	1	1	1	1	1	1	1	1	1	1
0	0	0	0	0	0	0	0	0	0	0	0	0	0
0	0	0	0	0	0	0	0	0	0	0	0	0	0
0	0	0	0	0	0	0	0	0	0	0	0	0	0
0	0	0	0	0	0	0	0	0	0	0	0	0	0
1	1	1	1	1	1	1	1	1	1	1	1	1	1
0	0	0	0	0	0	0	0	0	0	0	0	0	0
0	0	0	0	0	0	0	0	0	0	0	0	0	0
0	0	0	0	0	0	0	0	0	0	0	0	0	0
1	1	1	1	1	1	1	1	1	1	1	1	1	1
0	0	0	0	0	0	0	0	0	0	0	0	0	0
1	1	1	1	1	1	1	1	1	1	1	1	1	1
1	1	1	1	1	1	1	1	1	1	1	1	1	1
0	1	1	0	1	0	1	1	1	0	1	0	1	1
0	0	0	0	0	0	0	0	0	0	0	0	0	0
1	1	1	1	1	1	1	1	1	1	1	1	1	1
1	1	1	1	1	1	1	1	1	1	1	1	1	1
1	1	1	1	1	1	1	1	1	1	1	1	1	1

## Sheet: imputation
_1_itt	_2_itt	_3_itt	_4_itt	_5_itt	_6_itt	_7_itt	_8_itt	_9_itt	_10_itt	_11_itt	_12_itt	_13_itt	_14_itt	_15_itt	_16_itt	_17_itt	_18_itt	_19_itt	_20_itt	_21_itt	_22_itt	_23_itt	_24_itt	_25_itt	_26_itt	_27_itt	_28_itt	_29_itt	_30_itt	_31_itt	_32_itt	_33_itt	_34_itt	_35_itt	_36_itt	_37_itt	_38_itt	_39_itt	_40_itt	_41_itt	_42_itt	_43_itt	_44_itt	_45_itt	_46_itt	_47_itt	_48_itt	_49_itt	_50_itt
1	1	1	1	1	1	1	1	1	1	1	1	1	1	1	1	1	1	1	1	1	1	1	1	1	1	1	1	1	1	1	1	1	1	1	1	1	1	1	1	1	1	1	1	1	1	1	1	1	1
0	0	0	0	0	0	0	0	0	0	0	0	0	0	0	0	0	0	0	0	0	0	0	0	0	0	0	0	0	0	0	0	0	0	0	0	0	0	0	0	0	0	0	0	0	0	0	0	0	0
1	1	1	1	1	1	1	1	1	1	1	1	1	1	1	1	1	1	1	1	1	1	1	1	1	1	1	1	1	1	1	1	1	1	1	1	1	1	1	1	1	1	1	1	1	1	1	1	1	1
1	1	1	1	1	1	1	1	1	1	1	1	1	1	1	1	1	1	1	1	1	1	1	1	1	1	1	1	1	1	1	1	1	1	1	1	1	1	1	1	1	1	1	1	1	1	1	1	1	1
1	1	1	1	1	1	1	1	1	1	1	1	1	1	1	1	1	1	1	1	1	1	1	1	1	1	1	1	1	1	1	1	1	1	1	1	1	1	1	1	1	1	1	1	1	1	1	1	1	1
0	0	0	0	0	0	0	0	0	0	0	0	0	0	0	0	0	0	0	0	0	0	0	0	0	0	0	0	0	0	0	0	0	0	0	0	0	0	0	0	0	0	0	0	0	0	0	0	0	0
0	0	0	0	0	0	0	0	0	0	0	0	0	0	0	0	0	0	0	0	0	0	0	0	0	0	0	0	0	0	0	0	0	0	0	0	0	0	0	0	0	0	0	0	0	0	0	0	0	0
1	1	0	1	0	0	1	1	1	0	1	1	0	1	0	0	1	1	1	0	0	1	0	0	1	1	0	1	1	0	0	1	1	0	1	1	0	1	0	1	0	1	1	1	0	0	0	1	1	0
0	0	0	0	0	0	0	0	0	1	0	0	1	1	1	0	1	0	0	0	0	0	0	0	1	0	1	1	0	0	0	0	0	1	1	0	1	0	0	1	0	1	0	0	0	1	1	0	1	1
0	0	0	0	0	0	0	0	0	0	0	0	0	0	0	0	0	0	0	0	0	0	0	0	0	0	0	0	0	0	0	0	0	0	0	0	0	0	0	0	0	0	0	0	0	0	0	0	0	0
1	1	1	1	1	1	1	1	1	1	1	1	1	1	1	1	1	1	1	1	1	1	1	1	1	1	1	1	1	1	1	1	1	1	1	1	1	1	1	1	1	1	1	1	1	1	1	1	1	1
1	1	1	1	1	1	1	1	1	1	1	1	1	1	1	1	1	1	1	1	1	1	1	1	1	1	1	1	1	1	1	1	1	1	1	1	1	1	1	1	1	1	1	1	1	1	1	1	1	1
1	1	1	1	1	1	1	1	1	1	1	1	1	1	1	1	1	1	1	1	1	1	1	1	1	1	1	1	1	1	1	1	1	1	1	1	1	1	1	1	1	1	1	1	1	1	1	1	1	1
0	0	0	0	0	0	0	0	0	0	0	0	0	0	0	0	0	0	0	0	0	0	0	0	0	0	0	0	0	0	0	0	0	0	0	0	0	0	0	0	0	0	0	0	0	0	0	0	0	0
0	0	0	0	0	0	0	0	0	0	0	0	0	0	0	0	0	0	0	0	0	0	0	0	0	0	0	0	0	0	0	0	0	0	0	0	0	0	0	0	0	0	0	0	0	0	0	0	0	0
0	0	0	0	0	0	0	0	0	0	0	0	0	0	0	0	0	0	0	0	0	0	0	0	0	0	0	0	0	0	0	0	0	0	0	0	0	0	0	0	0	0	0	0	0	0	0	0	0	0
1	1	1	1	1	1	1	1	1	1	1	1	1	1	1	1	1	1	1	1	1	1	1	1	1	1	1	1	1	1	1	1	1	1	1	1	1	1	1	1	1	1	1	1	1	1	1	1	1	1
1	1	1	1	1	1	1	1	1	1	1	1	1	1	1	1	1	1	1	1	1	1	1	1	1	1	1	1	1	1	1	1	1	1	1	1	1	1	1	1	1	1	1	1	1	1	1	1	1	1
0	0	0	0	0	0	0	0	0	0	0	0	0	0	0	0	0	0	0	0	0	0	0	0	0	0	0	0	0	0	0	0	0	0	0	0	0	0	0	0	0	0	0	0	0	0	0	0	0	0
1	1	1	1	1	1	1	1	1	1	1	1	1	1	1	1	1	1	1	1	1	1	1	1	1	1	1	1	1	1	1	1	1	1	1	1	1	1	1	1	1	1	1	1	1	1	1	1	1	1
0	0	0	0	0	0	0	0	0	0	0	0	0	0	0	0	0	0	0	0	0	0	0	0	0	0	0	0	0	0	0	0	0	0	0	0	0	0	0	0	0	0	0	0	0	0	0	0	0	0
0	0	0	0	0	0	0	0	0	0	0	0	0	0	0	0	0	0	0	0	0	0	0	0	0	0	0	0	0	0	0	0	0	0	0	0	0	0	0	0	0	0	0	0	0	0	0	0	0	0
1	1	1	1	1	1	1	1	1	1	1	1	1	1	1	1	1	1	1	1	1	1	1	1	1	1	1	1	1	1	1	1	1	1	1	1	1	1	1	1	1	1	1	1	1	1	1	1	1	1
0	0	0	0	0	0	1	1	0	0	1	0	0	0	1	0	1	1	0	0	0	0	1	0	1	0	0	1	0	0	0	0	0	1	0	1	1	0	0	1	1	1	0	1	0	1	1	1	1	0
1	1	1	1	1	1	1	1	1	1	1	1	1	1	1	1	1	1	1	1	1	1	1	1	1	1	1	1	1	1	1	1	1	1	1	1	1	1	1	1	1	1	1	1	1	1	1	1	1	1
1	1	1	1	1	1	1	1	1	1	1	1	1	1	1	1	1	1	1	1	1	1	1	1	1	1	1	1	1	1	1	1	1	1	1	1	1	1	1	1	1	1	1	1	1	1	1	1	1	1
0	0	0	0	0	0	0	0	0	0	0	0	0	0	0	0	0	0	0	0	0	0	0	0	0	0	0	0	0	0	0	0	0	0	0	0	0	0	0	0	0	0	0	0	0	0	0	0	0	0
0	0	0	0	0	0	0	0	0	0	0	0	0	0	0	0	0	0	0	0	0	0	0	0	0	0	0	0	0	0	0	0	0	0	0	0	0	0	0	0	0	0	0	0	0	0	0	0	0	0
0	0	0	0	0	0	0	0	0	0	0	0	0	0	0	0	0	0	0	0	0	0	0	0	0	0	0	0	0	0	0	0	0	0	0	0	0	0	0	0	0	0	0	0	0	0	0	0	0	0
1	1	1	1	1	1	1	1	1	1	1	1	1	1	1	1	1	1	1	1	1	1	1	1	1	1	1	1	1	1	1	1	1	1	1	1	1	1	1	1	1	1	1	1	1	1	1	1	1	1
0	0	0	0	0	0	0	0	0	0	0	0	0	0	0	0	0	0	0	0	0	0	0	0	0	0	0	0	0	0	0	0	0	0	0	0	0	0	0	0	0	0	0	0	0	0	0	0	0	0
1	1	1	1	1	1	1	1	1	1	1	1	1	1	1	1	1	1	1	1	1	1	1	1	1	1	1	1	1	1	1	1	1	1	1	1	1	1	1	1	1	1	1	1	1	1	1	1	1	1
0	0	0	0	0	0	0	0	0	0	0	0	0	0	0	0	0	0	0	0	0	0	0	0	0	0	0	0	0	0	0	0	0	0	0	0	0	0	0	0	0	0	0	0	0	0	0	0	0	0
1	1	1	1	1	1	1	1	1	1	1	1	1	1	1	1	1	1	1	1	1	1	1	1	1	1	1	1	1	1	1	1	1	1	1	1	1	1	1	1	1	1	1	1	1	1	1	1	1	1
0	0	0	0	0	0	0	0	0	0	0	0	0	0	0	0	0	0	0	0	0	0	0	0	0	0	0	0	0	0	0	0	0	0	0	0	0	0	0	0	0	0	0	0	0	0	0	0	0	0
1	1	1	1	1	1	1	1	1	1	1	1	1	1	1	1	1	1	1	1	1	1	1	1	1	1	1	1	1	1	1	1	1	1	1	1	1	1	1	1	1	1	1	1	1	1	1	1	1	1
1	1	1	1	1	1	1	1	1	1	1	1	1	1	1	1	1	1	1	1	1	1	1	1	1	1	1	1	1	1	1	1	1	1	1	1	1	1	1	1	1	1	1	1	1	1	1	1	1	1
0	0	0	0	0	0	0	0	0	0	0	0	0	0	0	0	0	0	0	0	0	0	0	0	0	0	0	0	0	0	0	0	0	0	0	0	0	0	0	0	0	0	0	0	0	0	0	0	0	0
0	0	0	0	0	0	0	0	0	0	0	0	0	0	0	0	0	0	0	0	0	0	0	0	0	0	0	0	0	0	0	0	0	0	0	0	0	0	0	0	0	0	0	0	0	0	0	0	0	0
1	1	1	1	1	1	1	1	1	1	1	1	1	1	1	1	1	1	1	1	1	1	1	1	1	1	1	1	1	1	1	1	1	1	1	1	1	1	1	1	1	1	1	1	1	1	1	1	1	1
1	1	1	1	1	1	1	1	1	1	1	1	1	1	1	1	1	1	1	1	1	1	1	1	1	1	1	1	1	1	1	1	1	1	1	1	1	1	1	1	1	1	1	1	1	1	1	1	1	1
0	0	0	0	0	0	0	0	0	0	0	0	0	0	0	0	0	0	0	0	0	0	0	0	0	0	0	0	0	0	0	0	0	0	0	0	0	0	0	0	0	0	0	0	0	0	0	0	0	0
0	0	0	0	0	0	0	0	0	0	0	0	0	0	0	0	0	0	0	0	0	0	0	0	0	0	0	0	0	0	0	0	0	0	0	0	0	0	0	0	0	0	0	0	0	0	0	0	0	0
0	0	0	0	0	0	0	0	0	0	0	0	0	0	0	0	0	0	0	0	0	0	0	0	0	0	0	0	0	0	0	0	0	0	0	0	0	0	0	0	0	0	0	0	0	0	0	0	0	0
1	1	1	1	1	1	1	1	1	1	1	1	1	1	1	1	1	1	1	1	1	1	1	1	1	1	1	1	1	1	1	1	1	1	1	1	1	1	1	1	1	1	1	1	1	1	1	1	1	1
1	1	1	1	1	1	1	1	1	1	1	1	1	1	1	1	1	1	1	1	1	1	1	1	1	1	1	1	1	1	1	1	1	1	1	1	1	1	1	1	1	1	1	1	1	1	1	1	1	1
1	1	1	1	1	1	1	1	1	1	1	1	1	1	1	1	1	1	1	1	1	1	1	1	1	1	1	1	1	1	1	1	1	1	1	1	1	1	1	1	1	1	1	1	1	1	1	1	1	1
0	0	0	0	0	0	0	0	0	0	0	0	0	0	0	0	0	0	0	0	0	0	0	0	0	0	0	0	0	0	0	0	0	0	0	0	0	0	0	0	0	0	0	0	0	0	0	0	0	0
1	1	1	1	1	1	1	1	1	1	1	1	1	1	1	1	1	1	1	1	1	1	1	1	1	1	1	1	1	1	1	1	1	1	1	1	1	1	1	1	1	1	1	1	1	1	1	1	1	1
0	0	0	0	0	0	0	0	0	0	0	0	0	0	0	0	0	0	0	0	0	0	0	0	0	0	0	0	0	0	0	0	0	0	0	0	0	0	0	0	0	0	0	0	0	0	0	0	0	0
0	0	0	1	1	1	1	0	0	0	1	1	1	0	0	1	0	0	0	0	1	0	1	1	1	0	0	1	1	0	0	1	1	0	1	1	1	0	1	1	1	0	1	1	1	0	1	1	0	1
1	1	1	1	1	1	1	1	1	1	1	1	1	1	1	1	1	1	1	1	1	1	1	1	1	1	1	1	1	1	1	1	1	1	1	1	1	1	1	1	1	1	1	1	1	1	1	1	1	1
1	0	1	1	0	0	1	1	0	1	1	0	1	1	1	1	1	1	0	0	1	0	1	0	0	0	0	0	0	1	0	0	1	0	1	0	0	0	1	0	1	1	1	1	0	1	0	1	0	0
0	0	0	0	0	0	0	0	0	0	0	0	0	0	0	0	0	0	0	0	0	0	0	0	0	0	0	0	0	0	0	0	0	0	0	0	0	0	0	0	0	0	0	0	0	0	0	0	0	0
0	0	0	0	0	0	0	0	0	0	0	0	0	0	0	0	0	0	0	0	0	0	0	0	0	0	0	0	0	0	0	0	0	0	0	0	0	0	0	0	0	0	0	0	0	0	0	0	0	0
1	1	1	1	1	1	1	1	1	1	1	1	1	1	1	1	1	1	1	1	1	1	1	1	1	1	1	1	1	1	1	1	1	1	1	1	1	1	1	1	1	1	1	1	1	1	1	1	1	1
0	0	0	0	0	0	0	0	0	0	0	0	0	0	0	0	0	0	0	0	0	0	0	0	0	0	0	0	0	0	0	0	0	0	0	0	0	0	0	0	0	0	0	0	0	0	0	0	0	0
1	1	1	1	1	1	1	1	1	1	1	1	1	1	1	1	1	1	1	1	1	1	1	1	1	1	1	1	1	1	1	1	1	1	1	1	1	1	1	1	1	1	1	1	1	1	1	1	1	1
0	0	0	0	0	0	0	0	0	0	0	0	0	0	0	0	0	0	0	0	0	0	0	0	0	0	0	0	0	0	0	0	0	0	0	0	0	0	0	0	0	0	0	0	0	0	0	0	0	0
0	0	0	1	0	0	0	0	0	0	0	1	0	1	0	0	0	0	0	0	0	1	0	1	0	0	0	0	0	0	0	0	1	0	0	1	0	0	0	0	0	0	0	0	1	1	0	1	1	0
0	0	0	0	0	0	0	0	0	0	0	0	0	0	0	0	0	0	0	0	0	0	0	0	0	0	0	0	0	0	0	0	0	0	0	0	0	0	0	0	0	0	0	0	0	0	0	0	0	0
1	0	1	0	0	0	1	1	1	1	1	0	1	1	0	1	1	1	1	0	0	0	0	0	1	1	0	0	1	1	0	0	0	0	1	1	1	1	1	0	0	1	1	0	0	1	1	1	1	1
1	0	0	1	1	0	0	0	0	1	0	0	0	1	0	0	1	1	1	1	0	0	0	0	0	0	1	0	1	0	1	1	0	1	1	0	1	0	1	0	1	0	0	1	0	1	0	1	0	1
0	0	0	0	0	0	0	0	0	0	0	0	0	0	0	0	0	0	0	0	0	0	0	0	0	0	0	0	0	0	0	0	0	0	0	0	0	0	0	0	0	0	0	0	0	0	0	0	0	0
0	0	0	0	0	0	0	0	0	0	0	0	0	0	0	0	0	0	0	0	0	0	0	0	0	0	0	0	0	0	0	0	0	0	0	0	0	0	0	0	0	0	0	0	0	0	0	0	0	0
0	0	0	0	0	0	0	0	0	0	0	0	0	0	0	0	0	0	0	0	0	0	0	0	0	0	0	0	0	0	0	0	0	0	0	0	0	0	0	0	0	0	0	0	0	0	0	0	0	0
0	0	0	0	0	0	0	0	0	0	0	0	0	0	0	0	0	0	0	0	0	0	0	0	0	0	0	0	0	0	0	0	0	0	0	0	0	0	0	0	0	0	0	0	0	0	0	0	0	0
0	0	0	0	0	0	0	0	0	0	0	0	0	0	0	0	0	0	0	0	0	0	0	0	0	0	0	0	0	0	0	0	0	0	0	0	0	0	0	0	0	0	0	0	0	0	0	0	0	0
0	0	0	0	0	0	0	0	0	0	0	0	0	0	0	0	0	0	0	0	0	0	0	0	0	0	0	0	0	0	0	0	0	0	0	0	0	0	0	0	0	0	0	0	0	0	0	0	0	0
0	0	0	0	0	0	0	0	0	0	0	0	0	0	0	0	0	0	0	0	0	0	0	0	0	0	0	0	0	0	0	0	0	0	0	0	0	0	0	0	0	0	0	0	0	0	0	0	0	0
0	0	0	0	0	0	0	0	0	0	0	0	0	0	0	0	0	0	0	0	0	0	0	0	0	0	0	0	0	0	0	0	0	0	0	0	0	0	0	0	0	0	0	0	0	0	0	0	0	0
0	0	0	0	0	0	0	0	0	0	0	0	0	0	0	0	0	0	0	0	0	0	0	0	0	0	0	0	0	0	0	0	0	0	0	0	0	0	0	0	0	0	0	0	0	0	0	0	0	0
1	1	1	1	1	1	1	1	1	1	1	1	1	1	1	1	1	1	1	1	1	1	1	1	1	1	1	1	1	1	1	1	1	1	1	1	1	1	1	1	1	1	1	1	1	1	1	1	1	1
0	0	0	0	0	0	0	0	0	0	0	0	0	0	0	0	0	0	0	0	0	0	0	0	0	0	0	0	0	0	0	0	0	0	0	0	0	0	0	0	0	0	0	0	0	0	0	0	0	0
0	0	0	0	0	0	0	0	0	0	0	0	0	0	0	0	0	0	0	0	0	0	0	0	0	0	0	0	0	0	0	0	0	0	0	0	0	0	0	0	0	0	0	0	0	0	0	0	0	0
0	0	0	0	0	0	0	0	0	0	0	0	0	0	0	0	0	0	0	0	0	0	0	0	0	0	0	0	0	0	0	0	0	0	0	0	0	0	0	0	0	0	0	0	0	0	0	0	0	0
0	0	0	0	0	0	0	0	0	0	0	0	0	0	0	0	0	0	0	0	0	0	0	0	0	0	0	0	0	0	0	0	0	0	0	0	0	0	0	0	0	0	0	0	0	0	0	0	0	0
1	1	1	1	1	1	1	1	1	1	1	1	1	1	1	1	1	1	1	1	1	1	1	1	1	1	1	1	1	1	1	1	1	1	1	1	1	1	1	1	1	1	1	1	1	1	1	1	1	1
1	1	1	1	1	1	1	1	1	1	1	1	1	1	1	1	1	1	1	1	1	1	1	1	1	1	1	1	1	1	1	1	1	1	1	1	1	1	1	1	1	1	1	1	1	1	1	1	1	1
1	1	1	1	1	1	1	1	1	1	1	1	1	1	1	1	1	1	1	1	1	1	1	1	1	1	1	1	1	1	1	1	1	1	1	1	1	1	1	1	1	1	1	1	1	1	1	1	1	1
1	1	1	1	1	1	1	1	1	1	1	1	1	1	1	1	1	1	1	1	1	1	1	1	1	1	1	1	1	1	1	1	1	1	1	1	1	1	1	1	1	1	1	1	1	1	1	1	1	1
0	0	0	0	0	0	0	0	0	0	0	0	0	0	0	0	0	0	0	0	0	0	0	0	0	0	0	0	0	0	0	0	0	0	0	0	0	0	0	0	0	0	0	0	0	0	0	0	0	0
0	0	0	0	0	0	0	0	0	0	0	0	0	0	0	0	0	0	0	0	0	0	0	0	0	0	0	0	0	0	0	0	0	0	0	0	0	0	0	0	0	0	0	0	0	0	0	0	0	0
0	0	0	0	0	0	0	0	0	0	0	0	0	0	0	0	0	0	0	0	0	0	0	0	0	0	0	0	0	0	0	0	0	0	0	0	0	0	0	0	0	0	0	0	0	0	0	0	0	0
1	1	1	1	1	1	1	1	1	1	1	1	1	1	1	1	1	1	1	1	1	1	1	1	1	1	1	1	1	1	1	1	1	1	1	1	1	1	1	1	1	1	1	1	1	1	1	1	1	1
1	1	1	1	1	1	1	1	1	1	1	1	1	1	1	1	1	1	1	1	1	1	1	1	1	1	1	1	1	1	1	1	1	1	1	1	1	1	1	1	1	1	1	1	1	1	1	1	1	1
0	0	0	0	0	0	0	0	0	0	0	0	0	0	0	0	0	0	0	0	0	0	0	0	0	0	0	0	0	0	0	0	0	0	0	0	0	0	0	0	0	0	0	0	0	0	0	0	0	0
0	0	0	0	0	0	0	0	0	0	0	0	0	0	0	0	0	0	0	0	0	0	0	0	0	0	0	0	0	0	0	0	0	0	0	0	0	0	0	0	0	0	0	0	0	0	0	0	0	0
1	1	1	1	1	1	1	1	1	1	1	1	1	1	1	1	1	1	1	1	1	1	1	1	1	1	1	1	1	1	1	1	1	1	1	1	1	1	1	1	1	1	1	1	1	1	1	1	1	1
1	1	1	1	1	1	1	1	1	1	1	1	1	1	1	1	1	1	1	1	1	1	1	1	1	1	1	1	1	1	1	1	1	1	1	1	1	1	1	1	1	1	1	1	1	1	1	1	1	1
0	0	0	0	0	0	0	0	0	0	0	0	0	0	0	0	0	0	0	0	0	0	0	0	0	0	0	0	0	0	0	0	0	0	0	0	0	0	0	0	0	0	0	0	0	0	0	0	0	0
0	0	1	0	1	0	0	1	1	0	0	0	0	0	0	0	0	1	0	1	0	1	0	1	0	1	0	0	0	0	0	0	0	1	1	0	0	1	0	0	0	1	0	0	0	0	1	0	0	0
0	0	0	0	0	0	0	0	0	0	0	0	0	0	0	0	0	0	0	0	0	0	0	0	0	0	0	0	0	0	0	0	0	0	0	0	0	0	0	0	0	0	0	0	0	0	0	0	0	0
0	0	0	0	0	0	0	0	1	0	0	0	0	0	0	1	0	1	0	0	0	0	0	1	0	0	0	0	0	0	1	0	1	1	0	0	1	0	0	0	1	0	0	0	0	0	0	1	1	0
0	0	0	1	1	1	1	0	0	0	0	0	0	0	1	1	1	0	0	0	0	1	1	0	0	0	0	0	0	1	0	1	0	0	1	1	0	0	0	1	1	0	0	1	1	0	0	0	0	1
1	1	1	1	1	1	1	1	1	1	1	1	1	1	1	1	1	1	1	1	1	1	1	1	1	1	1	1	1	1	1	1	1	1	1	1	1	1	1	1	1	1	1	1	1	1	1	1	1	1
0	0	0	0	0	0	0	0	0	0	0	0	0	0	0	0	0	0	0	0	0	0	0	0	0	0	0	0	0	0	0	0	0	0	0	0	0	0	0	0	0	0	0	0	0	0	0	0	0	0
0	0	0	0	0	0	0	0	0	0	0	0	0	0	0	0	0	0	0	0	0	0	0	0	0	0	0	0	0	0	0	0	0	0	0	0	0	0	0	0	0	0	0	0	0	0	0	0	0	0
0	0	0	0	0	0	0	0	0	0	0	0	0	0	0	0	0	0	0	0	0	0	0	0	0	0	0	0	0	0	0	0	0	0	0	0	0	0	0	0	0	0	0	0	0	0	0	0	0	0
1	1	1	1	1	1	1	1	1	1	1	1	1	1	1	1	1	1	1	1	1	1	1	1	1	1	1	1	1	1	1	1	1	1	1	1	1	1	1	1	1	1	1	1	1	1	1	1	1	1
0	0	0	0	0	0	0	0	0	0	0	0	0	0	0	0	0	0	0	0	0	0	0	0	0	0	0	0	0	0	0	0	0	0	0	0	0	0	0	0	0	0	0	0	0	0	0	0	0	0
1	0	1	1	1	0	0	0	0	0	0	1	0	0	0	0	0	0	0	1	0	0	0	0	0	1	0	0	0	0	0	1	0	0	0	0	0	0	1	0	0	0	0	0	0	0	0	0	0	1
1	1	1	1	1	1	1	1	1	1	1	1	1	1	1	1	1	1	1	1	1	1	1	1	1	1	1	1	1	1	1	1	1	1	1	1	1	1	1	1	1	1	1	1	1	1	1	1	1	1
0	0	0	0	0	0	0	0	0	0	0	0	0	0	0	0	0	0	0	0	0	0	0	0	0	0	0	0	0	0	0	0	0	0	0	0	0	0	0	0	0	0	0	0	0	0	0	0	0	0
0	0	0	0	0	0	0	0	0	0	0	0	0	0	0	0	0	0	0	0	0	0	0	0	0	0	0	0	0	0	0	0	0	0	0	0	0	0	0	0	0	0	0	0	0	0	0	0	0	0
1	1	1	1	1	1	1	1	1	1	1	1	1	1	1	1	1	1	1	1	1	1	1	1	1	1	1	1	1	1	1	1	1	1	1	1	1	1	1	1	1	1	1	1	1	1	1	1	1	1
1	1	1	1	1	1	1	1	1	1	1	1	1	1	1	1	1	1	1	1	1	1	1	1	1	1	1	1	1	1	1	1	1	1	1	1	1	1	1	1	1	1	1	1	1	1	1	1	1	1
1	1	1	1	1	1	1	1	1	1	1	1	1	1	1	1	1	1	1	1	1	1	1	1	1	1	1	1	1	1	1	1	1	1	1	1	1	1	1	1	1	1	1	1	1	1	1	1	1	1
0	0	0	0	0	0	0	0	0	0	0	0	0	0	0	0	0	0	0	0	0	0	0	0	0	0	0	0	0	0	0	0	0	0	0	0	0	0	0	0	0	0	0	0	0	0	0	0	0	0
0	0	0	0	0	0	0	0	0	0	0	0	0	0	0	0	0	0	0	0	0	0	0	0	0	0	0	0	0	0	0	0	0	0	0	0	0	0	0	0	0	0	0	0	0	0	0	0	0	0
0	0	0	0	0	0	0	0	0	0	0	0	0	0	0	0	0	0	0	0	0	0	0	0	0	0	0	0	0	0	0	0	0	0	0	0	0	0	0	0	0	0	0	0	0	0	0	0	0	0
0	0	0	0	0	0	0	0	0	0	0	0	0	0	0	0	0	0	0	0	0	0	0	0	0	0	0	0	0	0	0	0	0	0	0	0	0	0	0	0	0	0	0	0	0	0	0	0	0	0
1	1	1	1	1	1	1	1	1	1	1	1	1	1	1	1	1	1	1	1	1	1	1	1	1	1	1	1	1	1	1	1	1	1	1	1	1	1	1	1	1	1	1	1	1	1	1	1	1	1
0	0	0	0	0	0	0	0	0	0	0	0	0	0	0	0	0	0	0	0	0	0	0	0	0	0	0	0	0	0	0	0	0	0	0	0	0	0	0	0	0	0	0	0	0	0	0	0	0	0
0	0	0	0	0	0	0	0	0	0	0	0	0	0	0	0	0	0	0	0	0	0	0	0	0	0	0	0	0	0	0	0	0	0	0	0	0	0	0	0	0	0	0	0	0	0	0	0	0	0
1	1	1	1	1	1	1	1	1	1	1	1	1	1	1	1	1	1	1	1	1	1	1	1	1	1	1	1	1	1	1	1	1	1	1	1	1	1	1	1	1	1	1	1	1	1	1	1	1	1
1	1	1	1	1	1	1	1	1	1	1	1	1	1	1	1	1	1	1	1	1	1	1	1	1	1	1	1	1	1	1	1	1	1	1	1	1	1	1	1	1	1	1	1	1	1	1	1	1	1
0	0	0	0	0	0	0	0	0	0	0	0	0	0	0	0	0	0	0	0	0	0	0	0	0	0	0	0	0	0	0	0	0	0	0	0	0	0	0	0	0	0	0	0	0	0	0	0	0	0
0	0	0	0	0	0	0	0	0	0	0	0	0	0	0	0	0	0	0	0	0	0	0	0	0	0	0	0	0	0	0	0	0	0	0	0	0	0	0	0	0	0	0	0	0	0	0	0	0	0
0	0	0	0	0	0	0	0	0	0	0	0	0	0	0	0	0	0	0	0	0	0	0	0	0	0	0	0	0	0	0	0	0	0	0	0	0	0	0	0	0	0	0	0	0	0	0	0	0	0
1	1	1	1	1	1	1	1	1	1	1	1	1	1	1	1	1	1	1	1	1	1	1	1	1	1	1	1	1	1	1	1	1	1	1	1	1	1	1	1	1	1	1	1	1	1	1	1	1	1
0	0	0	0	0	0	0	0	0	0	0	0	0	0	0	0	0	0	0	0	0	0	0	0	0	0	0	0	0	0	0	0	0	0	0	0	0	0	0	0	0	0	0	0	0	0	0	0	0	0
0	0	0	0	0	0	0	0	0	0	0	0	0	0	0	0	0	0	0	0	0	0	0	0	0	0	0	0	0	0	0	0	0	0	0	0	0	0	0	0	0	0	0	0	0	0	0	0	0	0
0	0	0	0	0	0	0	0	0	0	0	0	0	0	0	0	0	0	0	0	0	0	0	0	0	0	0	0	0	0	0	0	0	0	0	0	0	0	0	0	0	0	0	0	0	0	0	0	0	0
1	1	1	1	1	1	1	1	1	1	1	1	1	1	1	1	1	1	1	1	1	1	1	1	1	1	1	1	1	1	1	1	1	1	1	1	1	1	1	1	1	1	1	1	1	1	1	1	1	1
1	1	1	1	1	1	1	1	1	1	1	1	1	1	1	1	1	1	1	1	1	1	1	1	1	1	1	1	1	1	1	1	1	1	1	1	1	1	1	1	1	1	1	1	1	1	1	1	1	1
1	1	1	1	1	1	1	1	1	1	1	1	1	1	1	1	1	1	1	1	1	1	1	1	1	1	1	1	1	1	1	1	1	1	1	1	1	1	1	1	1	1	1	1	1	1	1	1	1	1
1	1	1	1	1	1	1	1	1	1	1	1	1	1	1	1	1	1	1	1	1	1	1	1	1	1	1	1	1	1	1	1	1	1	1	1	1	1	1	1	1	1	1	1	1	1	1	1	1	1
1	1	1	1	1	1	1	1	1	1	1	1	1	1	1	1	1	1	1	1	1	1	1	1	1	1	1	1	1	1	1	1	1	1	1	1	1	1	1	1	1	1	1	1	1	1	1	1	1	1
1	1	1	1	1	1	1	1	1	1	1	1	1	1	1	1	1	1	1	1	1	1	1	1	1	1	1	1	1	1	1	1	1	1	1	1	1	1	1	1	1	1	1	1	1	1	1	1	1	1
1	1	1	1	1	1	1	1	1	1	1	1	1	1	1	1	1	1	1	1	1	1	1	1	1	1	1	1	1	1	1	1	1	1	1	1	1	1	1	1	1	1	1	1	1	1	1	1	1	1
1	1	1	1	1	1	1	1	1	1	1	1	1	1	1	1	1	1	1	1	1	1	1	1	1	1	1	1	1	1	1	1	1	1	1	1	1	1	1	1	1	1	1	1	1	1	1	1	1	1
0	0	0	0	0	0	0	0	0	0	0	0	0	0	0	0	0	0	0	0	0	0	0	0	0	0	0	0	0	0	0	0	0	0	0	0	0	0	0	0	0	0	0	0	0	0	0	0	0	0
0	0	0	0	0	0	0	0	0	0	0	0	0	0	0	0	0	0	0	0	0	0	0	0	0	0	0	0	0	0	0	0	0	0	0	0	0	0	0	0	0	0	0	0	0	0	0	0	0	0
0	0	0	0	0	0	0	0	0	0	0	0	0	0	0	0	0	0	0	0	0	0	0	0	0	0	0	0	0	0	0	0	0	0	0	0	0	0	0	0	0	0	0	0	0	0	0	0	0	0
0	0	0	0	0	0	0	0	0	0	0	0	0	0	0	0	0	0	0	0	0	0	0	0	0	0	0	0	0	0	0	0	0	0	0	0	0	0	0	0	0	0	0	0	0	0	0	0	0	0
1	0	1	1	1	1	0	1	0	1	0	1	0	0	1	0	0	1	1	1	0	0	0	1	1	0	0	0	0	1	0	0	1	0	1	1	0	0	0	0	0	0	0	1	0	0	1	0	0	0
0	1	0	0	1	1	0	1	0	0	1	1	1	0	0	0	1	0	0	1	1	0	0	0	1	1	0	0	1	0	0	1	1	1	1	1	0	0	0	0	0	1	0	0	0	0	1	0	1	1
0	0	0	0	0	0	0	0	0	0	0	0	0	0	0	0	0	0	0	0	0	0	0	0	0	0	0	0	0	0	0	0	0	0	0	0	0	0	0	0	0	0	0	0	0	0	0	0	0	0
0	0	0	0	0	0	0	0	0	0	0	0	0	0	0	0	0	0	0	0	0	0	0	0	0	0	0	0	0	0	0	0	0	0	0	0	0	0	0	0	0	0	0	0	0	0	0	0	0	0
0	0	0	0	0	0	0	0	0	0	0	0	0	0	0	0	0	0	0	0	0	0	0	0	0	0	0	0	0	0	0	0	0	0	0	0	0	0	0	0	0	0	0	0	0	0	0	0	0	0
0	0	0	0	0	0	0	0	0	0	0	0	0	0	0	0	0	0	0	0	0	0	0	0	0	0	0	0	0	0	0	0	0	0	0	0	0	0	0	0	0	0	0	0	0	0	0	0	0	0
1	1	1	1	1	1	1	1	1	1	1	1	1	1	1	1	1	1	1	1	1	1	1	1	1	1	1	1	1	1	1	1	1	1	1	1	1	1	1	1	1	1	1	1	1	1	1	1	1	1
1	0	0	0	0	0	0	1	1	0	0	0	0	0	0	0	0	1	1	0	0	0	0	1	0	1	0	0	0	0	1	0	1	0	0	1	0	0	0	0	0	0	0	0	1	1	0	0	0	0
0	0	0	0	0	0	0	0	0	0	0	0	0	0	0	0	0	0	0	0	0	0	0	0	0	0	0	0	0	0	0	0	0	0	0	0	0	0	0	0	0	0	0	0	0	0	0	0	0	0
0	0	0	0	0	0	0	0	0	0	0	0	0	0	0	0	0	0	0	0	0	0	0	0	0	0	0	0	0	0	0	0	0	0	0	0	0	0	0	0	0	0	0	0	0	0	0	0	0	0
0	0	0	0	0	0	0	0	0	0	0	0	0	0	0	0	0	0	0	0	0	0	0	0	0	0	0	0	0	0	0	0	0	0	0	0	0	0	0	0	0	0	0	0	0	0	0	0	0	0
0	0	0	0	0	0	0	0	0	0	0	0	0	0	0	0	0	0	0	0	0	0	0	0	0	0	0	0	0	0	0	0	0	0	0	0	0	0	0	0	0	0	0	0	0	0	0	0	0	0
0	0	0	0	0	0	0	0	0	0	0	0	0	0	0	0	0	0	0	0	0	0	0	0	0	0	0	0	0	0	0	0	0	0	0	0	0	0	0	0	0	0	0	0	0	0	0	0	0	0
1	1	1	1	1	1	1	1	1	1	1	1	1	1	1	1	1	1	1	1	1	1	1	1	1	1	1	1	1	1	1	1	1	1	1	1	1	1	1	1	1	1	1	1	1	1	1	1	1	1
1	1	1	1	1	1	1	1	1	1	1	1	1	1	1	1	1	1	1	1	1	1	1	1	1	1	1	1	1	1	1	1	1	1	1	1	1	1	1	1	1	1	1	1	1	1	1	1	1	1
0	0	0	0	0	0	0	0	0	0	0	0	0	0	0	0	0	0	0	0	0	0	0	0	0	0	0	0	0	0	0	0	0	0	0	0	0	0	0	0	0	0	0	0	0	0	0	0	0	0
1	1	1	1	1	1	1	1	1	1	1	1	1	1	1	1	1	1	1	1	1	1	1	1	1	1	1	1	1	1	1	1	1	1	1	1	1	1	1	1	1	1	1	1	1	1	1	1	1	1
0	0	0	0	0	0	0	0	0	0	0	0	0	0	0	0	0	0	0	0	0	0	0	0	0	0	0	0	0	0	0	0	0	0	0	0	0	0	0	0	0	0	0	0	0	0	0	0	0	0
0	0	0	0	0	0	0	0	0	0	0	0	0	0	0	0	0	0	0	0	0	0	0	0	0	0	0	0	0	0	0	0	0	0	0	0	0	0	0	0	0	0	0	0	0	0	0	0	0	0
0	0	0	0	0	0	0	0	0	0	0	0	0	0	0	0	0	0	0	0	0	0	0	0	0	0	0	0	0	0	0	0	0	0	0	0	0	0	0	0	0	0	0	0	0	0	0	0	0	0
1	1	1	1	1	1	1	1	1	1	1	1	1	1	1	1	1	1	1	1	1	1	1	1	1	1	1	1	1	1	1	1	1	1	1	1	1	1	1	1	1	1	1	1	1	1	1	1	1	1
0	0	0	0	0	0	0	0	0	0	0	0	0	0	0	0	0	0	0	0	0	0	0	0	0	0	0	0	0	0	0	0	0	0	0	0	0	0	0	0	0	0	0	0	0	0	0	0	0	0
0	0	0	0	0	0	0	0	0	0	0	0	0	0	0	0	0	0	0	0	0	0	0	0	0	0	0	0	0	0	0	0	0	0	0	0	0	0	0	0	0	0	0	0	0	0	0	0	0	0
0	0	0	0	0	0	0	0	0	0	0	0	0	0	0	0	0	0	0	0	0	0	0	0	0	0	0	0	0	0	0	0	0	0	0	0	0	0	0	0	0	0	0	0	0	0	0	0	0	0
0	0	0	0	0	0	0	0	0	0	0	0	0	0	0	0	0	0	0	0	0	0	0	0	0	0	0	0	0	0	0	0	0	0	0	0	0	0	0	0	0	0	0	0	0	0	0	0	0	0
1	1	1	1	1	1	1	1	1	1	1	1	1	1	1	1	1	1	1	1	1	1	1	1	1	1	1	1	1	1	1	1	1	1	1	1	1	1	1	1	1	1	1	1	1	1	1	1	1	1
0	0	0	0	0	0	0	0	0	0	0	0	0	0	0	0	0	0	0	0	0	0	0	0	0	0	0	0	0	0	0	0	0	0	0	0	0	0	0	0	0	0	0	0	0	0	0	0	0	0
0	0	0	0	0	0	0	0	0	0	0	0	0	0	0	0	0	0	0	0	0	0	0	0	0	0	0	0	0	0	0	0	0	0	0	0	0	0	0	0	0	0	0	0	0	0	0	0	0	0
0	0	0	0	0	0	0	0	0	0	0	0	0	0	0	0	0	0	0	0	0	0	0	0	0	0	0	0	0	0	0	0	0	0	0	0	0	0	0	0	0	0	0	0	0	0	0	0	0	0
1	1	1	1	1	1	1	1	1	1	1	1	1	1	1	1	1	1	1	1	1	1	1	1	1	1	1	1	1	1	1	1	1	1	1	1	1	1	1	1	1	1	1	1	1	1	1	1	1	1
0	0	0	0	0	0	0	0	0	0	0	0	0	0	0	0	0	0	0	0	0	0	0	0	0	0	0	0	0	0	0	0	0	0	0	0	0	0	0	0	0	0	0	0	0	0	0	0	0	0
1	1	1	1	1	1	1	1	1	1	1	1	1	1	1	1	1	1	1	1	1	1	1	1	1	1	1	1	1	1	1	1	1	1	1	1	1	1	1	1	1	1	1	1	1	1	1	1	1	1
1	1	1	1	1	1	1	1	1	1	1	1	1	1	1	1	1	1	1	1	1	1	1	1	1	1	1	1	1	1	1	1	1	1	1	1	1	1	1	1	1	1	1	1	1	1	1	1	1	1
1	1	0	0	0	0	0	1	1	1	0	0	0	0	0	1	0	0	1	0	0	0	0	0	0	0	0	0	0	0	0	0	0	0	0	0	0	0	1	1	1	0	0	0	0	0	0	1	0	1
0	0	0	0	0	0	0	0	0	0	0	0	0	0	0	0	0	0	0	0	0	0	0	0	0	0	0	0	0	0	0	0	0	0	0	0	0	0	0	0	0	0	0	0	0	0	0	0	0	0
1	1	1	1	1	1	1	1	1	1	1	1	1	1	1	1	1	1	1	1	1	1	1	1	1	1	1	1	1	1	1	1	1	1	1	1	1	1	1	1	1	1	1	1	1	1	1	1	1	1
1	1	1	1	1	1	1	1	1	1	1	1	1	1	1	1	1	1	1	1	1	1	1	1	1	1	1	1	1	1	1	1	1	1	1	1	1	1	1	1	1	1	1	1	1	1	1	1	1	1
1	1	1	1	1	1	1	1	1	1	1	1	1	1	1	1	1	1	1	1	1	1	1	1	1	1	1	1	1	1	1	1	1	1	1	1	1	1	1	1	1	1	1	1	1	1	1	1	1	1
[truncated: 79 more columns]
